# Supplementary material
Source: publisher figshare collection journal article supplement (https://frontiersin.figshare.com/ndownloader/files/12389888)

**Fig. S1** Fragments of eight hypothetical bacteriocins and two nonribosomal antimicrobial peptides identified by LC-MS/MS.

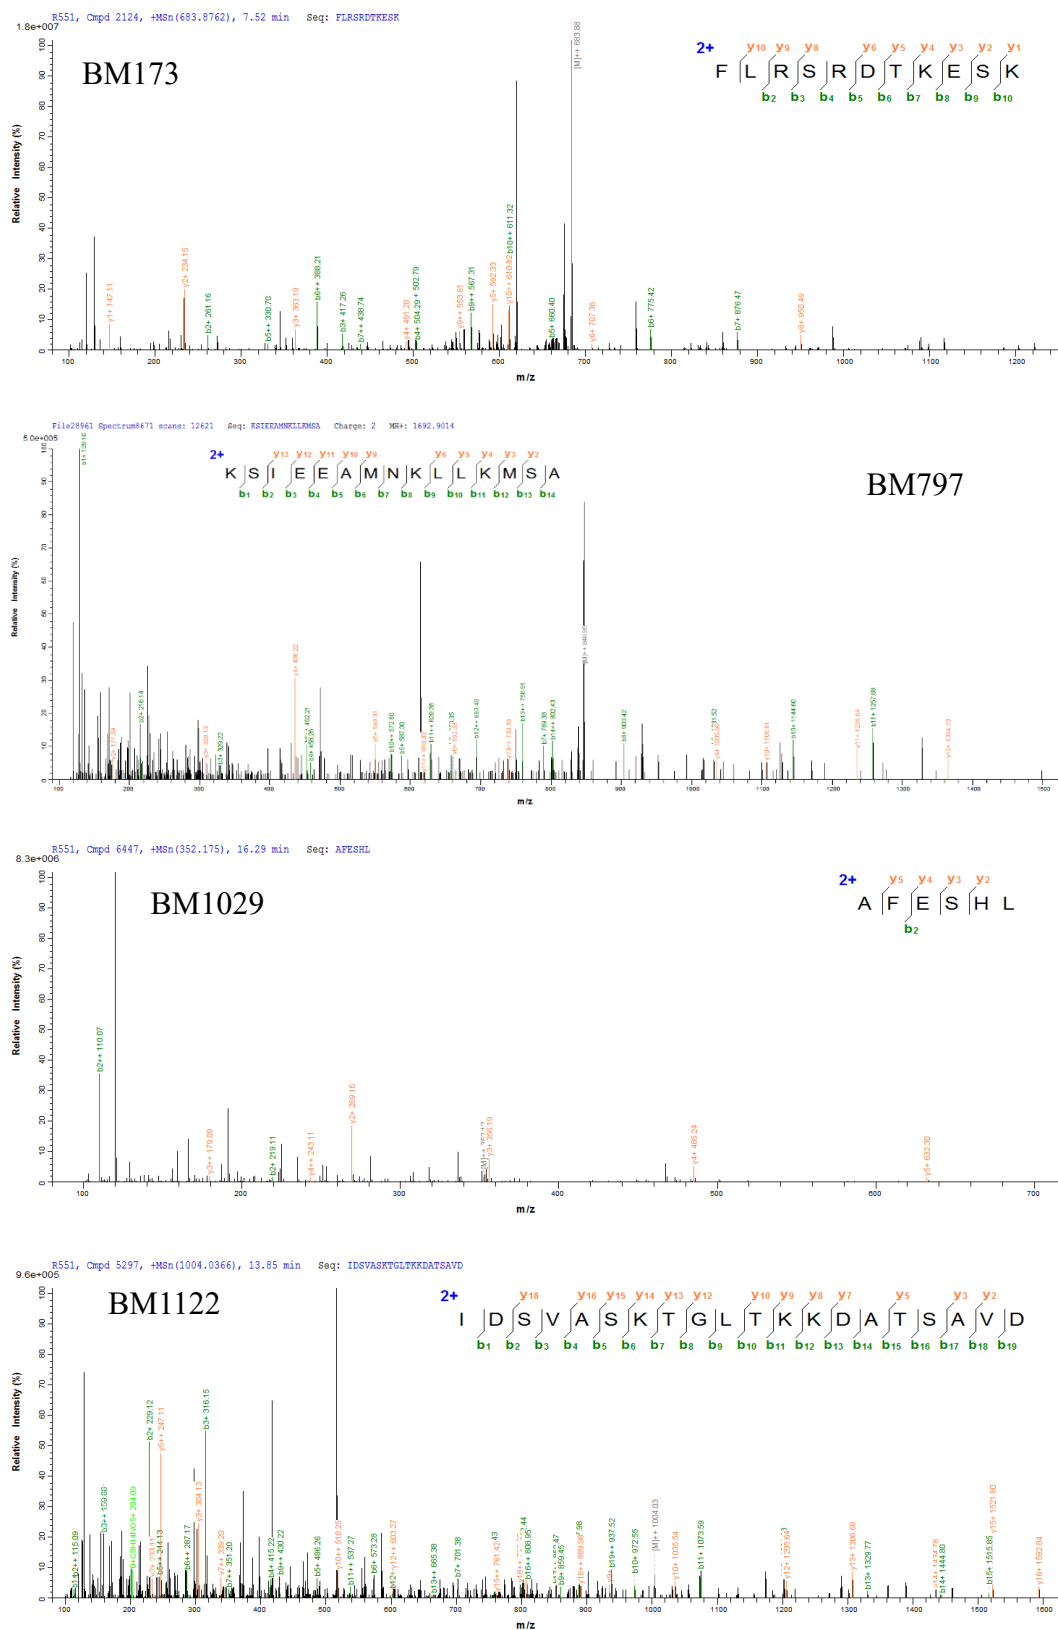

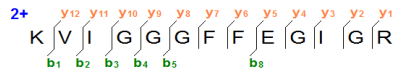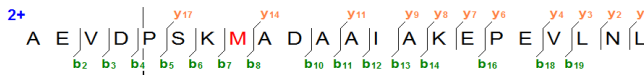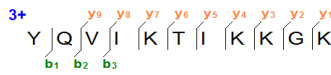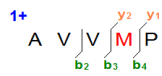

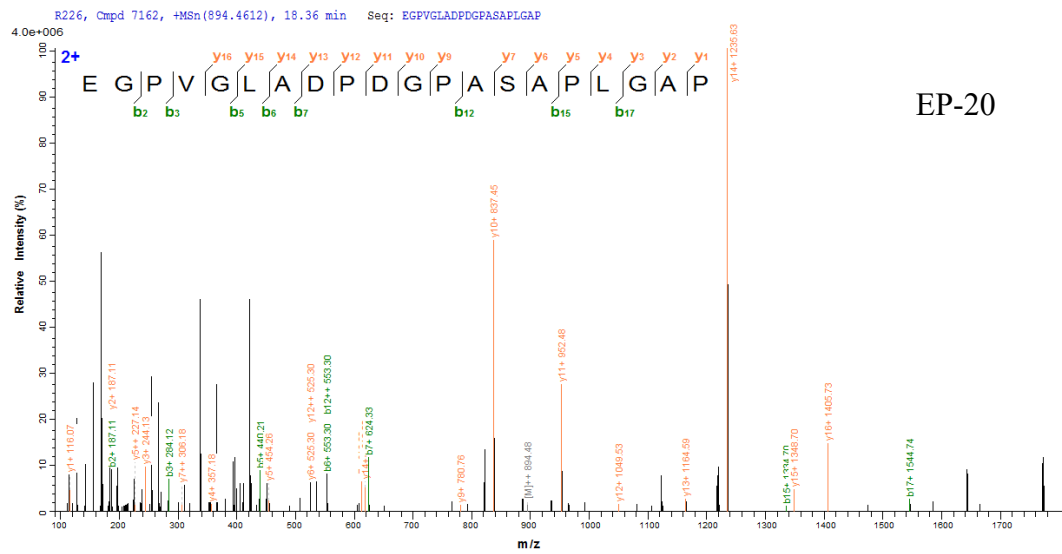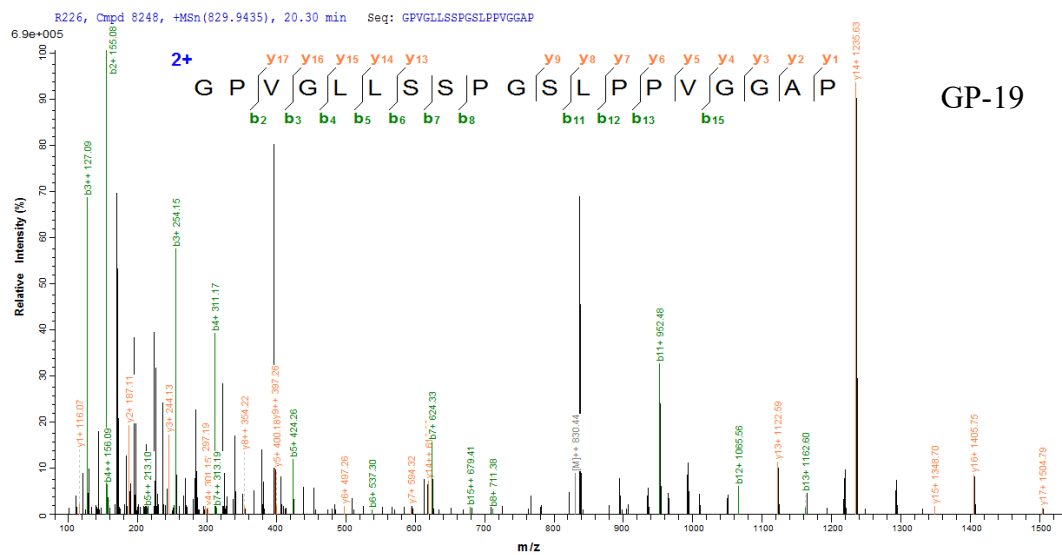

Supplement: Supplementary file [file 12389888]
